# Supplementary material for: Molecular p–n heterojunction-enhanced visible-light hydrogen evolution over a N-doped TiO2photocatalyst
Source: Royal Society of Chemistry journal article supplement (doi:10.1039/c7cy00495h), 2017-01-01
Supplement: c7cy00495h1.pdf [file c7cy00495h1.pdf]

## Electronic supplementary information

# Molecular p-n heterojunction-enhanced visible-light hydrogen evolution over N-doped TiO<sub>2</sub> photocatalyst

Liming Chen,<sup>a,b</sup> Quan Gu,<sup>c</sup> Linxi Hou,<sup>b\*</sup> Chaoqiang Zhang,<sup>a</sup> Yinbing Lu,<sup>a</sup> Xuxu Wang<sup>a</sup> and Jinlin Long<sup>a\*</sup>

<sup>a</sup> Research Institute of Photocatalysis, State Key Laboratory of Photocatalysis on Energy and Environment, College of Chemistry, Fuzhou University, Fuzhou, 350002, People's Republic of China

<sup>b</sup> Department of Materials-Oriented Chemical Engineering, College of Chemical Engineering, Fuzhou University, Fuzhou, 350108, People's Republic of China

<sup>c</sup> Key Laboratory of Applied Surface and Colloid Chemistry, Ministry of Education, School of Chemistry and Chemical Engineering, Shaanxi Normal University, Xi'an, 710062, People's Republic of China

### Table of Contents

|          |                   |                |
|----------|-------------------|----------------|
| <b>1</b> | <b>Figure S1.</b> | <b>Page S2</b> |
| <b>2</b> | <b>Figure S2.</b> | <b>Page S2</b> |
| <b>3</b> | <b>Figure S3.</b> | <b>Page S2</b> |
| <b>4</b> | <b>Figure S4.</b> | <b>Page S3</b> |
| <b>5</b> | <b>Figure S5.</b> | <b>Page S3</b> |
| <b>6</b> | <b>Figure S6.</b> | <b>Page S4</b> |
| <b>7</b> | <b>Table S1.</b>  | <b>Page S5</b> |
| <b>8</b> | <b>Table S2.</b>  | <b>Page S6</b> |

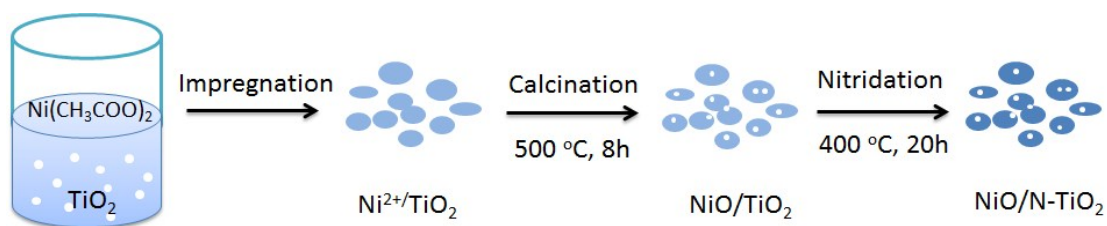

**Figure S1.** The preparation process of the NiO coupled N doped  $\text{TiO}_2$  samples

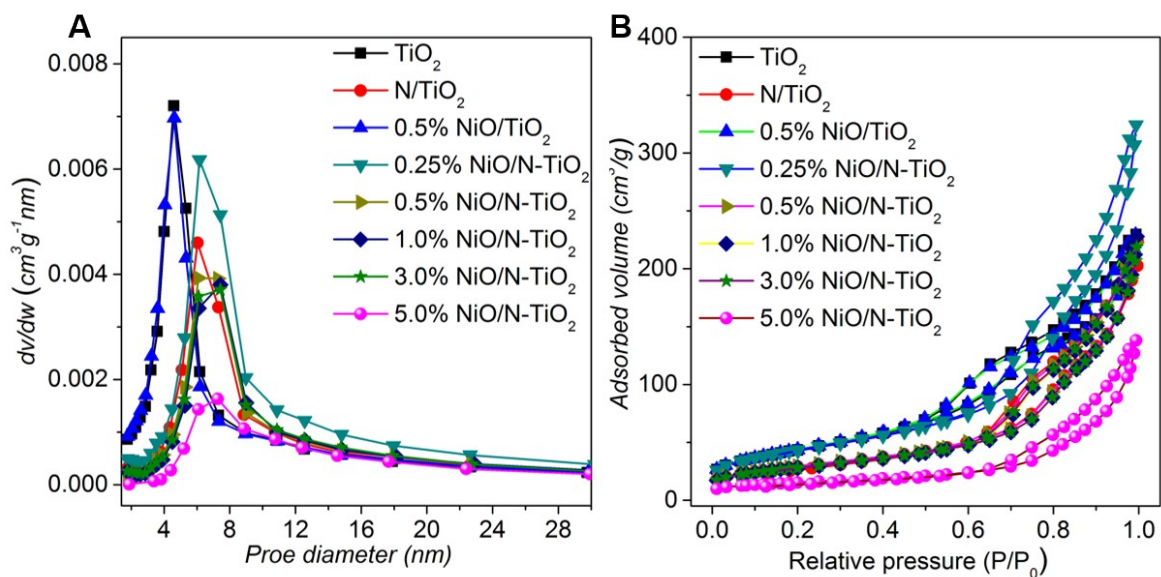

**Figure S2.** (A) The nitrogen adsorption-desorption isotherms and (B) the corresponding pore-size distribution curves of samples.

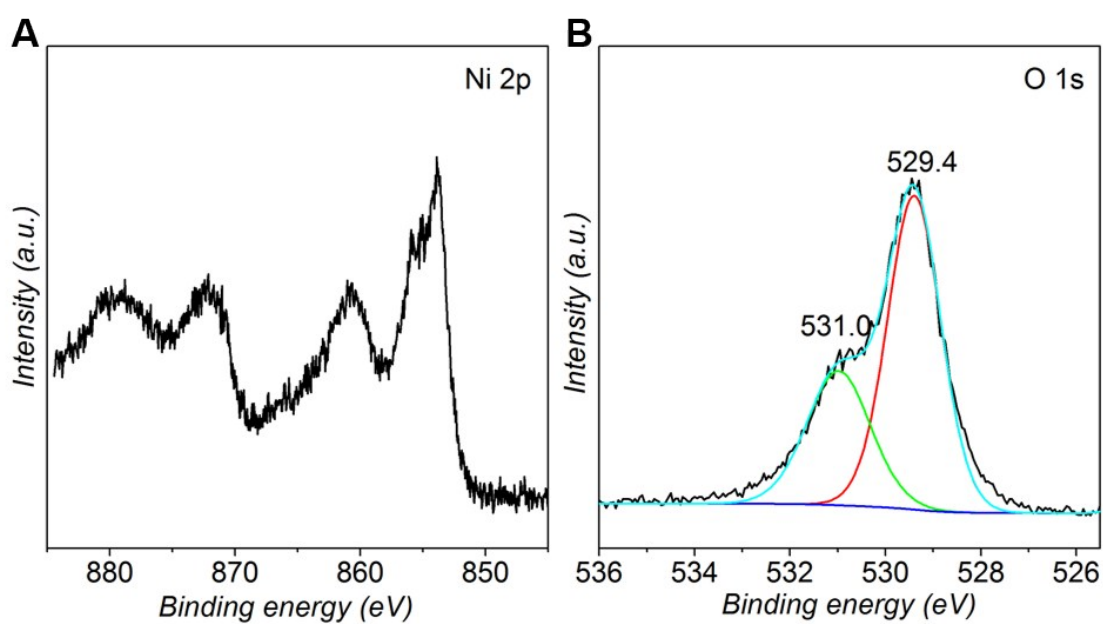

**Figure S3.** The high resolution core XPS spectra of Ni 2p and O 1s of bare NiO nanoparticles.

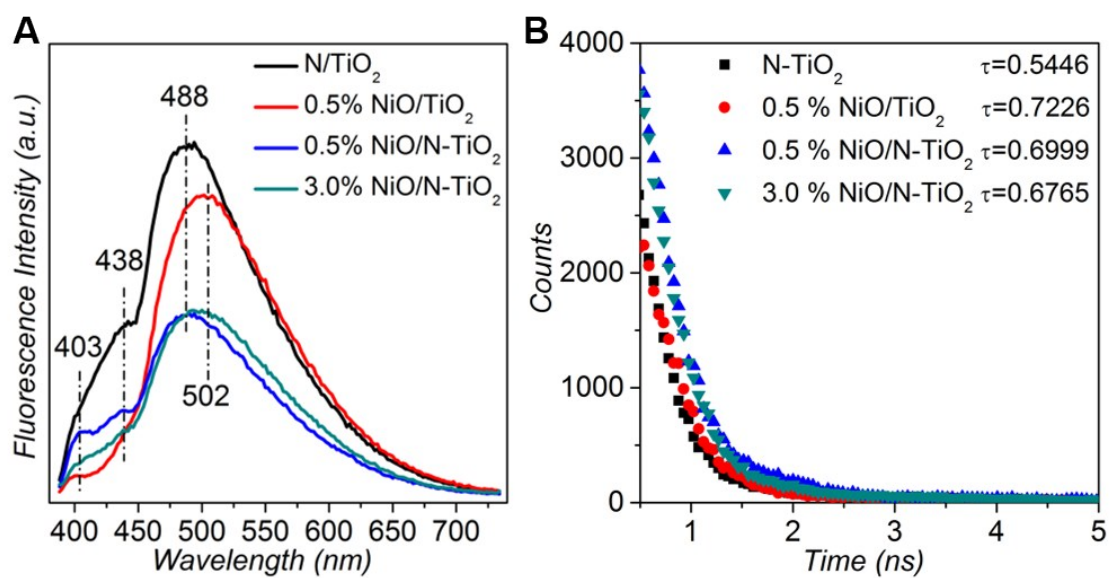

**Figure S4.** (A) PL emission spectra of N-TiO<sub>2</sub>, 0.5 wt% NiO/TiO<sub>2</sub>, 0.5 wt% NiO/N-TiO<sub>2</sub> and 3.0 wt% NiO/N-TiO<sub>2</sub> samples with excitation wavelength of 380 nm. (B) Time-resolved PL decays of samples.

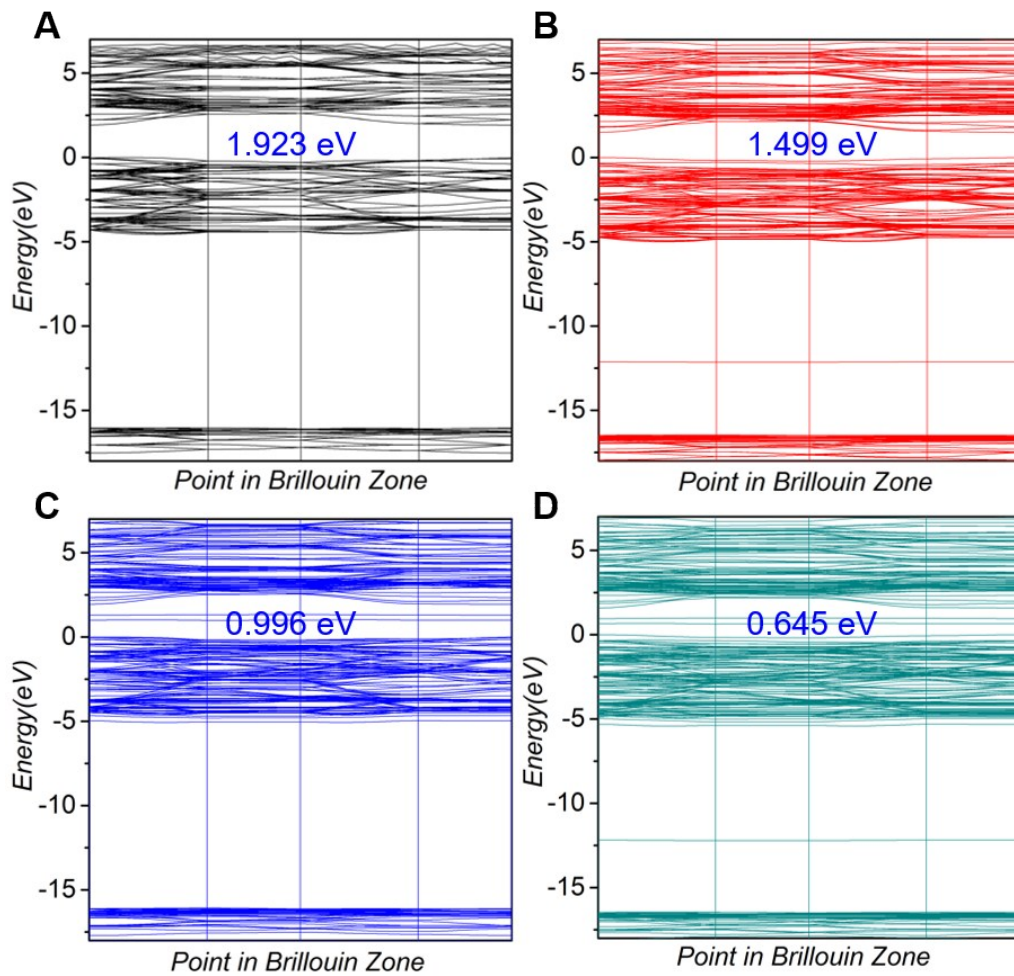

**Figure S5.** The band structure of (A)  $\text{TiO}_2$ , (B) N- $\text{TiO}_2$ , (C) N- $\text{TiO}_2$  and (D) NiO/N- $\text{TiO}_2$  photocatalysts.

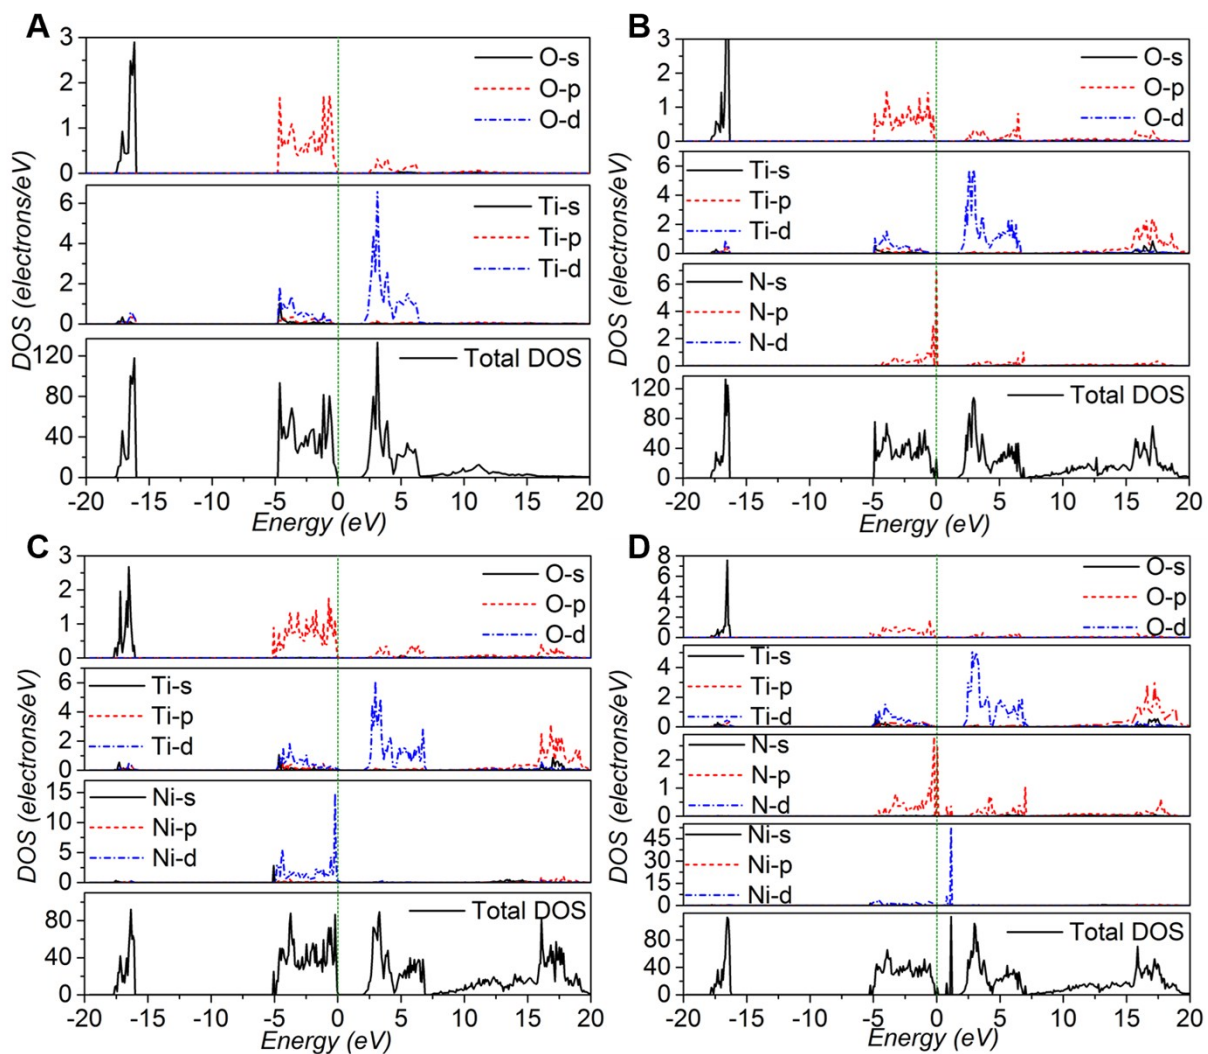

**Figure S6.** The density of states (DOS) of (A)  $\text{TiO}_2$ , (B)  $\text{N-TiO}_2$ , (C)  $\text{N-TiO}_2$  and (D)  $\text{NiO/N-TiO}_2$  photocatalysts.

**Table S1.** Physicochemical Characteristics of TiO<sub>2</sub>, N-TiO<sub>2</sub>, 0.5 wt% NiO/TiO<sub>2</sub> and x wt% NiO/N-TiO<sub>2</sub> samples.

| Sample                      | N wt% | Ni wt% | Ni/N  | Pore Volume<br>(mL/g) | Pore Size<br>(nm) | S <sub>BET</sub><br>(m <sup>2</sup> /g) |
|-----------------------------|-------|--------|-------|-----------------------|-------------------|-----------------------------------------|
| TiO <sub>2</sub>            | -     | -      | -     | 0.3606                | 6.90              | 159.0                                   |
| N/TiO <sub>2</sub>          | 0.77  | -      | -     | 0.3352                | 9.60              | 111.4                                   |
| 0.5%NiO/TiO <sub>2</sub>    | 0     | 0.53   | -     | 0.3604                | 6.97              | 160.4                                   |
| 0.25%NiO/N-TiO <sub>2</sub> | 0.77  | 0.27   | 0.084 | 0.5049                | 10.29             | 107.8                                   |
| 0.35%NiO/N-TiO <sub>2</sub> | 0.77  | 0.39   | 0.124 | 0.3525                | 10.62             | 105.9                                   |
| 0.5%NiO/N-TiO <sub>2</sub>  | 0.77  | 0.51   | 0.158 | 0.3467                | 10.56             | 106.6                                   |
| 1.0%NiO/N-TiO <sub>2</sub>  | 0.77  | 1.05   | 0.326 | 0.3545                | 11.20             | 102.3                                   |
| 1.5%NiO/N-TiO <sub>2</sub>  | 0.77  | 1.62   | 0.502 | 0.3452                | 10.69             | 102.7                                   |
| 2.0%NiO/N-TiO <sub>2</sub>  | 0.77  | 2.11   | 0.654 | 0.3360                | 11.26             | 98.4                                    |
| 3.0%NiO/N-TiO <sub>2</sub>  | 0.77  | 3.03   | 0.939 | 0.3404                | 10.55             | 102.8                                   |
| 5.0%NiO/N-TiO <sub>2</sub>  | 0.77  | 5.22   | 1.618 | 0.2142                | 13.02             | 54.1                                    |
| 10.0%NiO/N-TiO <sub>2</sub> | 0.77  | 9.33   | 2.892 | 0.2193                | 12.06             | 62.4                                    |

**Table S2.** Peak position (eV) of Ti 2p, O 1s, N 1s, and Ni 2p from XPS spectra.

| Sample                      | Binding Energy (eV)  |                      |        |                      |                      |        |       |       |
|-----------------------------|----------------------|----------------------|--------|----------------------|----------------------|--------|-------|-------|
|                             | Ti 2p <sub>3/2</sub> | Ti 2p <sub>1/2</sub> | O 1s   | Ni 2p <sub>3/2</sub> | Ni 2p <sub>3/2</sub> | N 1s   |       |       |
| TiO <sub>2</sub>            | 458.92               | 464.69               | 530.25 | 531.95               |                      |        |       |       |
| N/TiO <sub>2</sub>          | 458.74               | 464.54               | 530.03 | 531.95               |                      |        | 400.0 |       |
| 0.5%NiO/TiO <sub>2</sub>    | 458.49               | 464.22               | 529.96 | 531.74               | 855.40               | 873.20 |       |       |
| 0.25%NiO/N-TiO <sub>2</sub> | 458.67               | 464.43               | 529.93 | 531.70               |                      |        | 400.6 |       |
| 0.5%NiO/N-TiO <sub>2</sub>  | 458.51               | 464.28               | 529.76 | 531.51               |                      |        | 401.0 |       |
| 1.0%NiO/N-TiO <sub>2</sub>  | 458.54               | 464.32               | 529.78 | 531.53               | 855.59               | 873.29 | 400.0 | 401.9 |
| 3.0%NiO/N-TiO <sub>2</sub>  | 458.55               | 464.33               | 529.90 | 531.63               | 855.63               | 873.30 | 399.9 | 401.9 |
| 5.0%NiO/N-TiO <sub>2</sub>  | 458.59               | 464.35               | 529.94 | 531.65               | 855.71               | 873.36 | 399.7 | 401.9 |
| NiO                         | -                    | -                    | 529.42 | 531.01               | 854.91               | 872.60 |       |       |
